# Supplementary material for: Isolation, culture, and characterisation of bovine ovarian fetal fibroblasts and gonadal ridge epithelial-like cells and comparison to their adult counterparts
Source: PubMed Central journal article supplement (PMC9269465; doi:10.1371/journal.pone.0268467), 2022-07-08

**S4 Fig. Normalised gene expression of genes in GREL cells and fetal fibroblasts.** Gene expression levels in cultured GREL (●; n = 7 number of samples analysed) and fetal fibroblasts (▲; n = 6) were normalised to PPIA and RPL32, and they are presented as scatter plots.

# A mRNA expression levels of epithelial cell-specific genes

## A1 *KRT19*

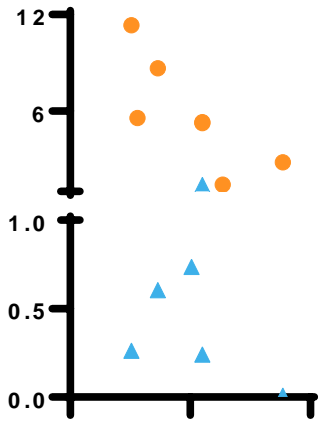

## A2 *DSG2*

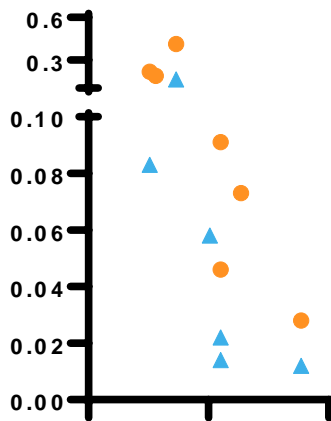

## A3 *PKP2*

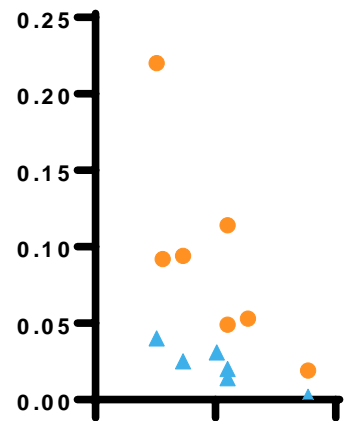

Normalised Gene Expression

## A4 *OCNL*

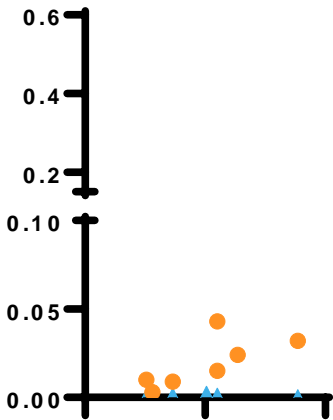

## A5 *MUC1*

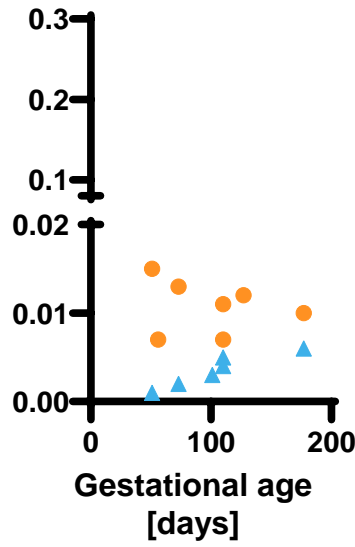

## A6 *GJA1*

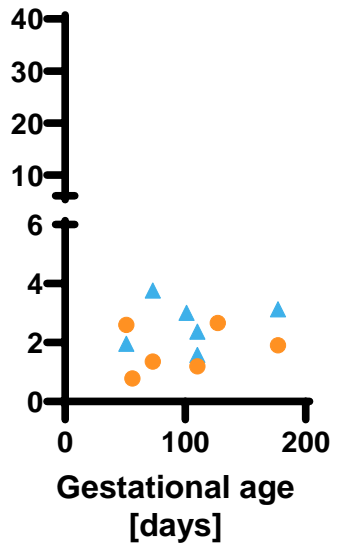

## A7 *CTNNB1*

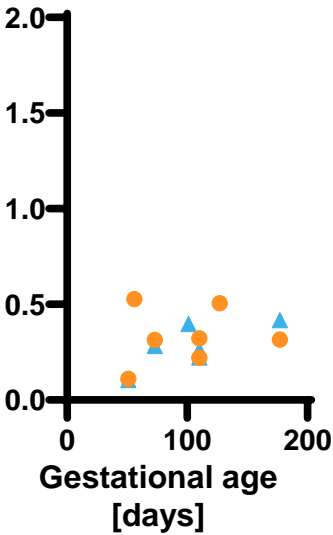

## B mRNA expression levels of stromal matrix-specific genes

B1 *LAMB2*

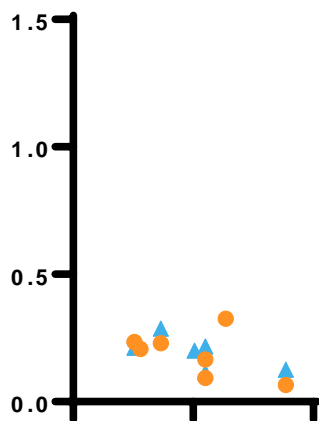

B2 *FBN1*

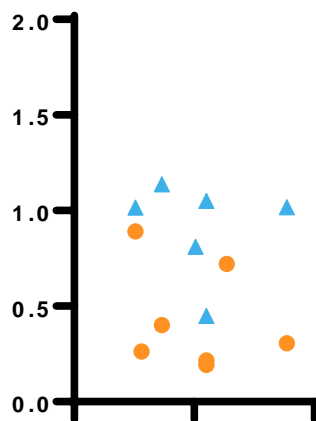

B3 *COL1A1*

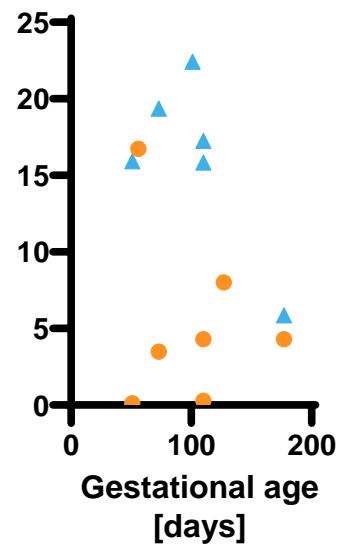

B4 *COL3A1*

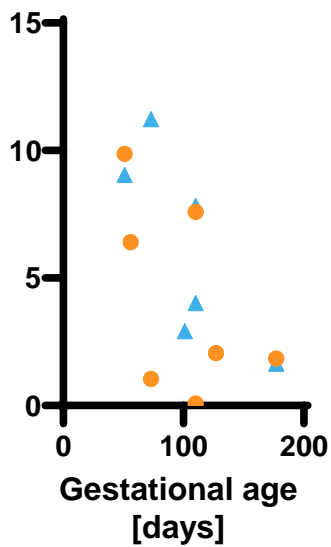

B5 *COL4A1*

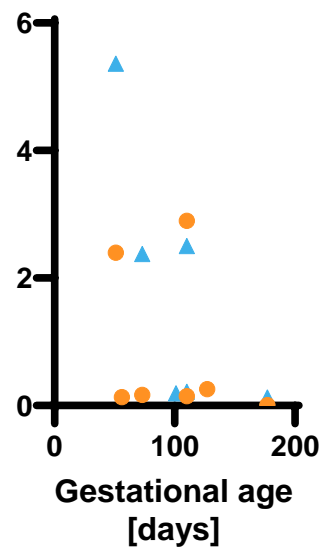

Normalised Gene Expression

### C mRNA expression levels of steroidogenesis-specific genes

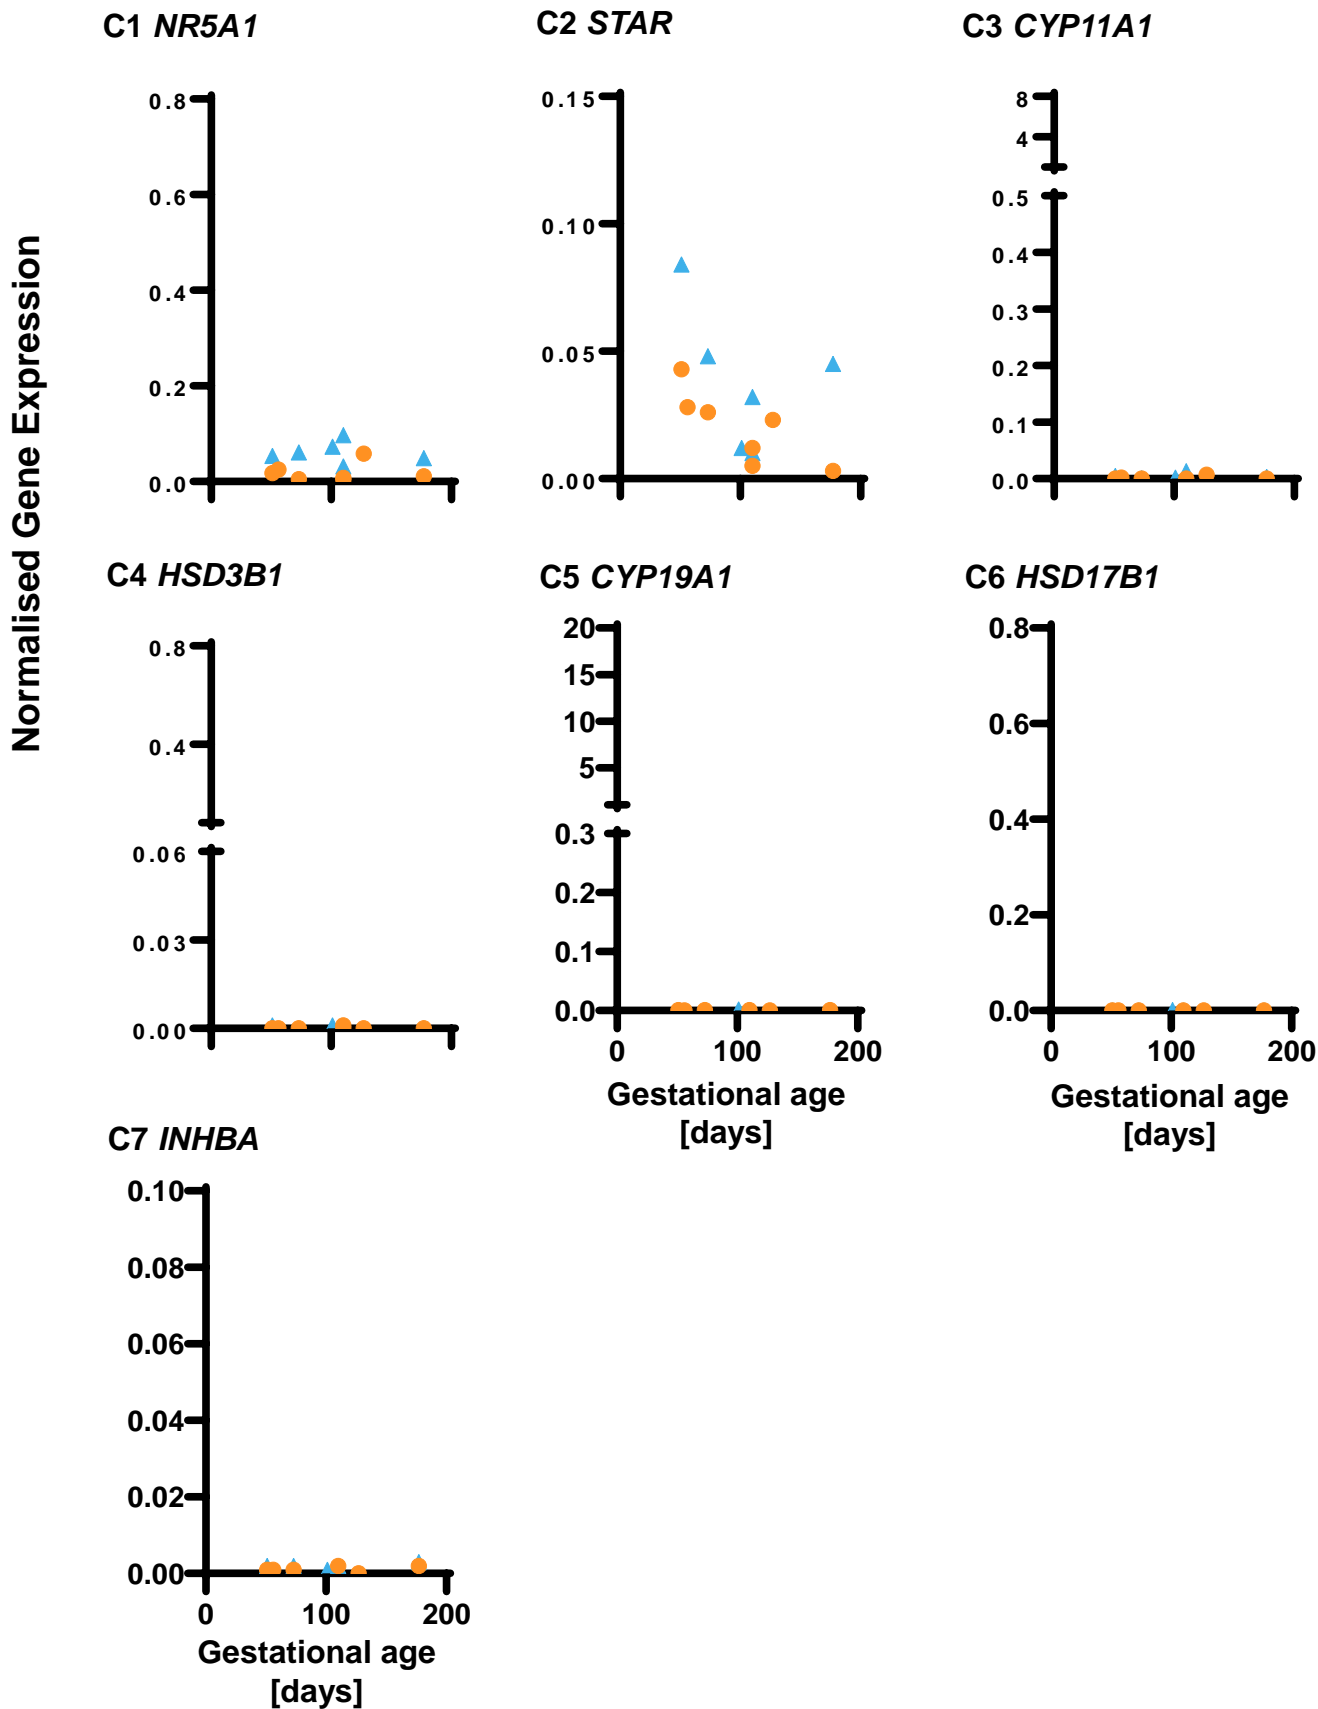

# D mRNA expression levels of receptors in estrogen and TGF- $\beta$ signalling pathways

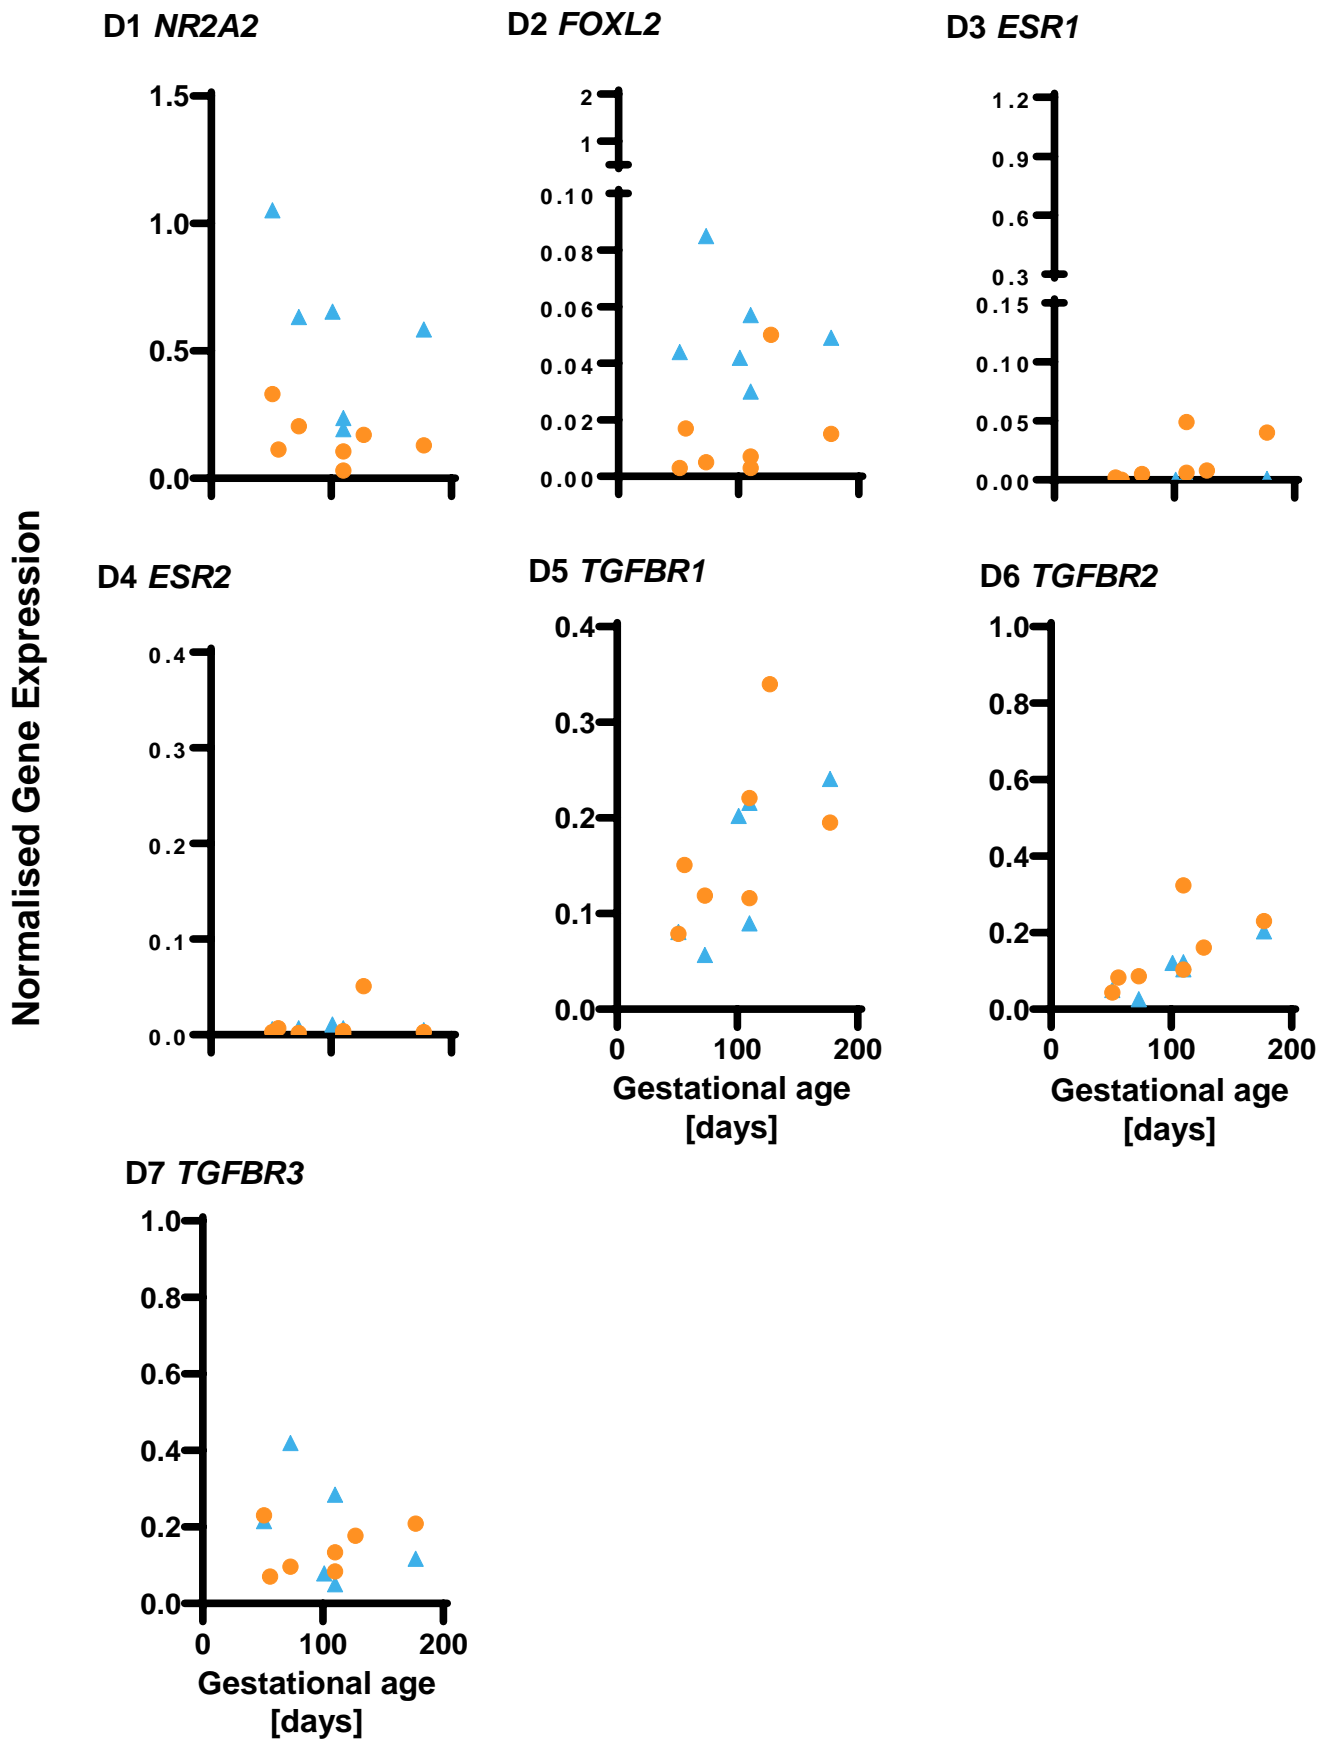

# E mRNA expression levels of cell cycle-specific genes

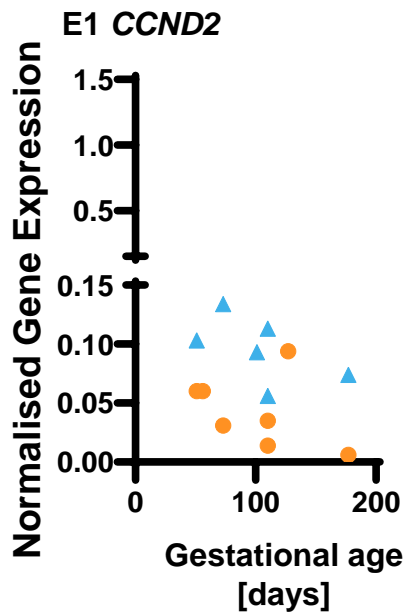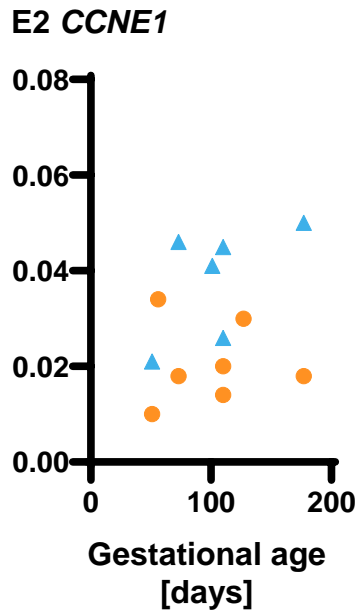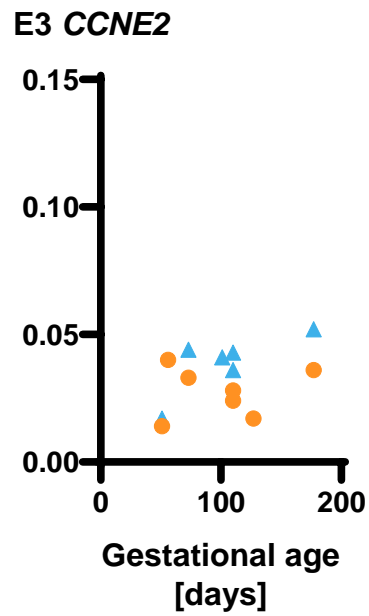

## F mRNA expression levels of receptors instem and germ cell-specific genes

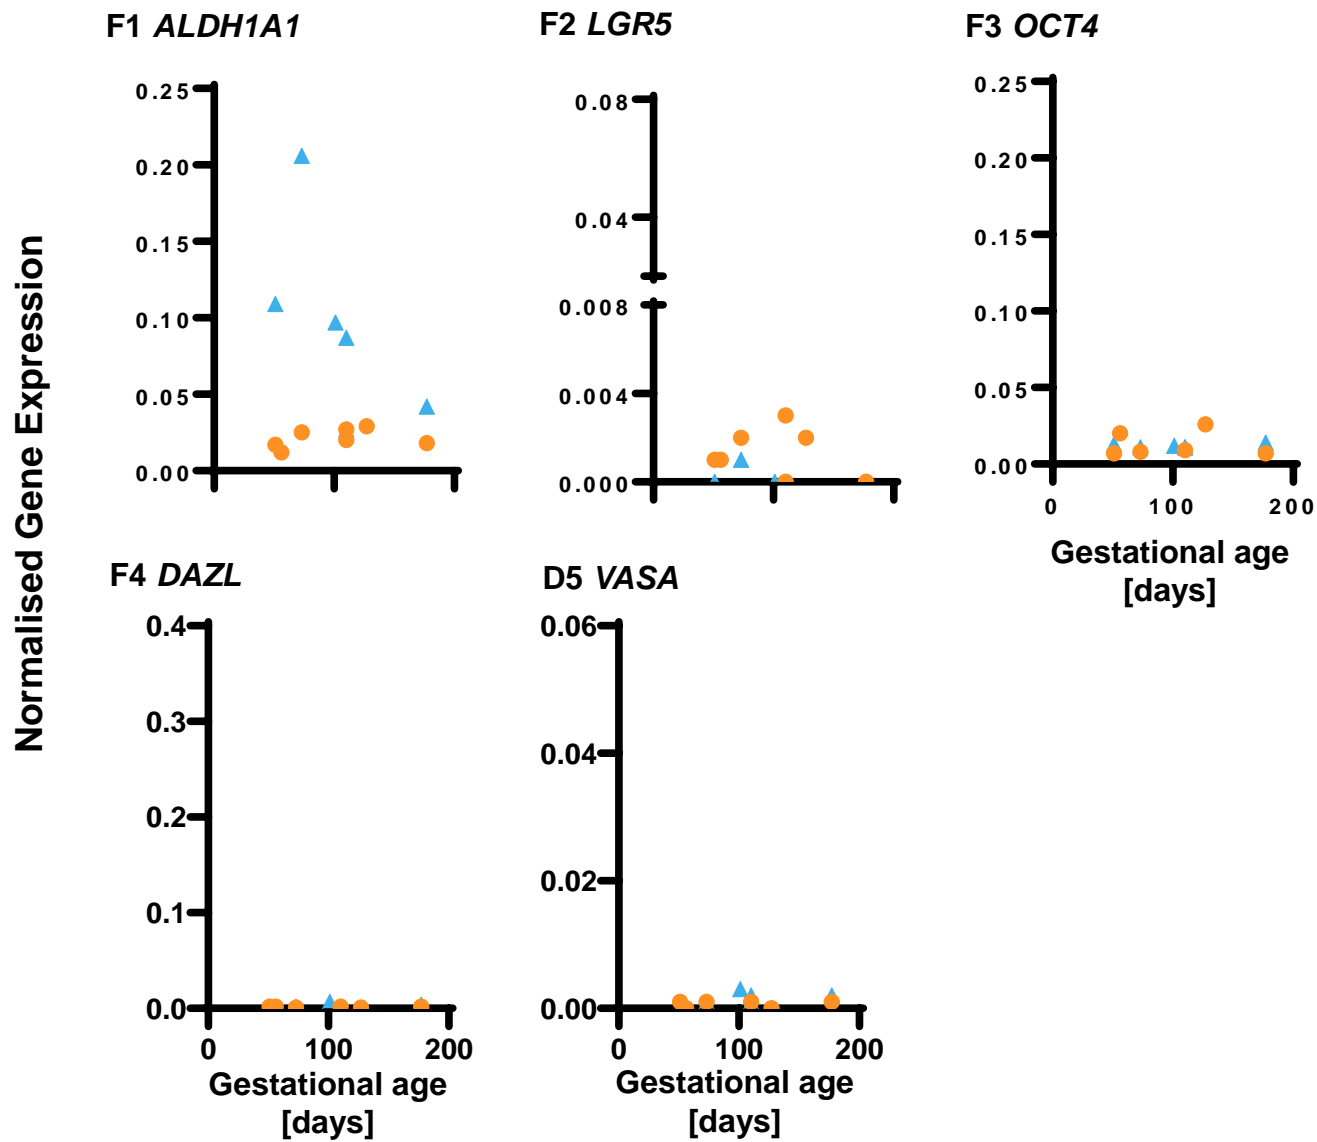

Supplement: pone.0268467.s004.pdf [file pone.0268467.s004.pdf]
