# Supplementary material for: Isolation, culture, and characterisation of bovine ovarian fetal fibroblasts and gonadal ridge epithelial-like cells and comparison to their adult counterparts
Source: PubMed Central journal article supplement (PMC9269465; doi:10.1371/journal.pone.0268467), 2022-07-08

**S5 Fig. Normalised gene expression of stromal genes in fetal fibroblasts in the presence of different treatments.** Fibroblasts from bovine fetal ovary (n = 5) were cultured with different treatments for 18 h. Fold changes of gene expression to the control groups are presented as mean  $\pm$  SEM (normalised to *PPIA* and *RPL32*). Significantly different results among groups were determined by one-way ANOVA with Tukey's post-hoc test.

## A *NR2F2*

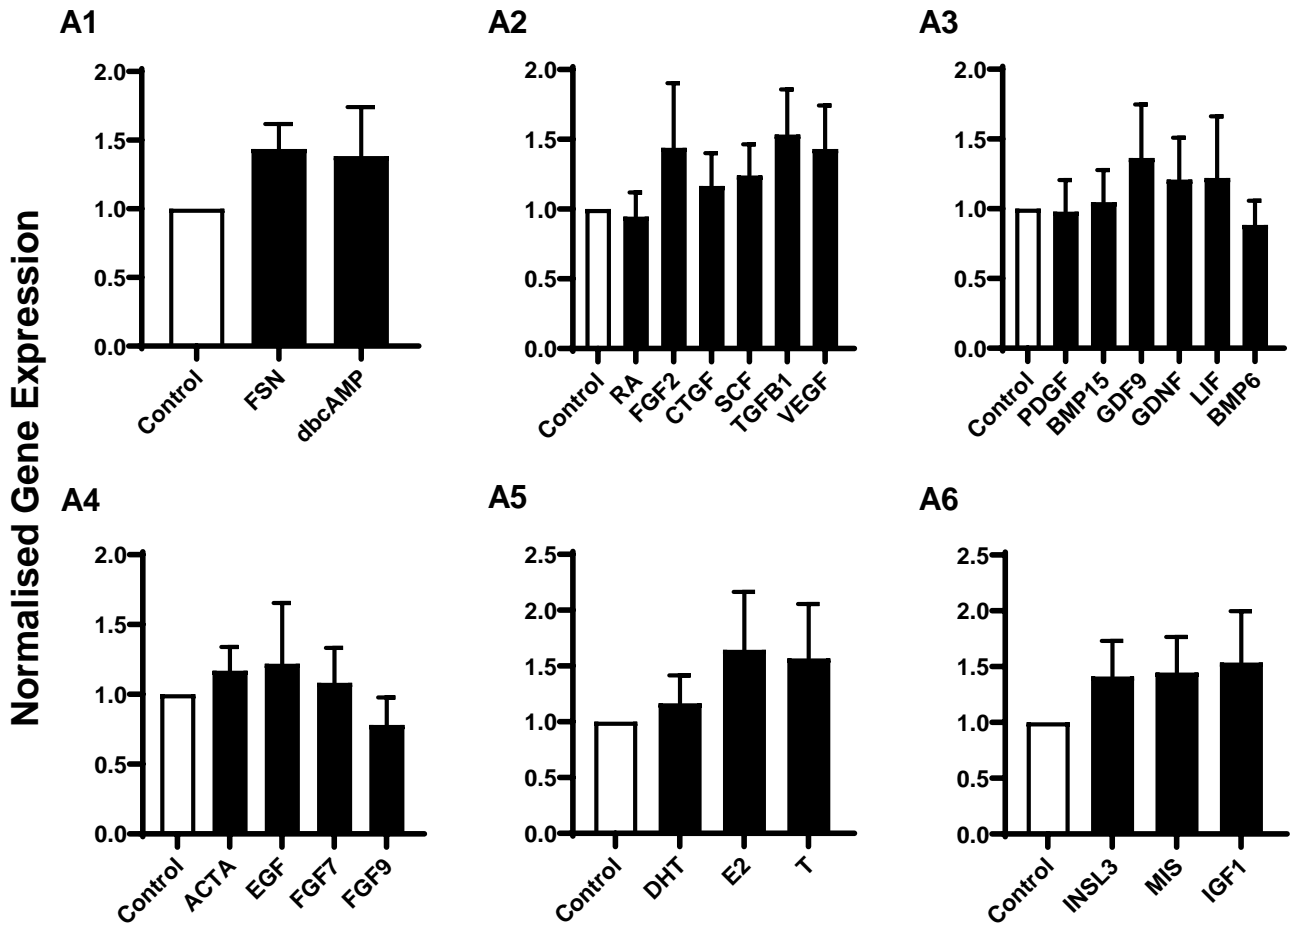

## B *FBN1*

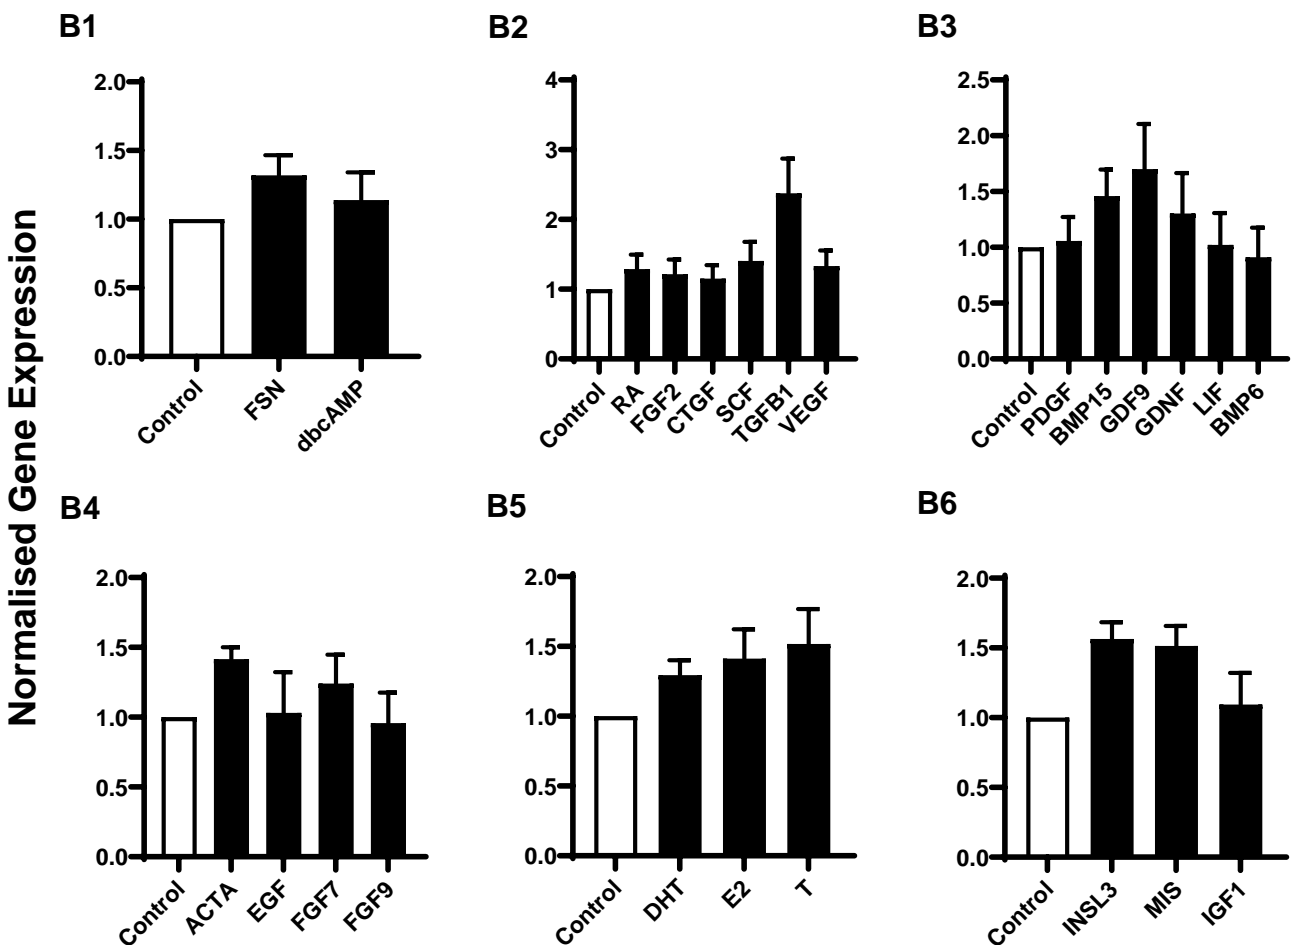

## C COL1A1

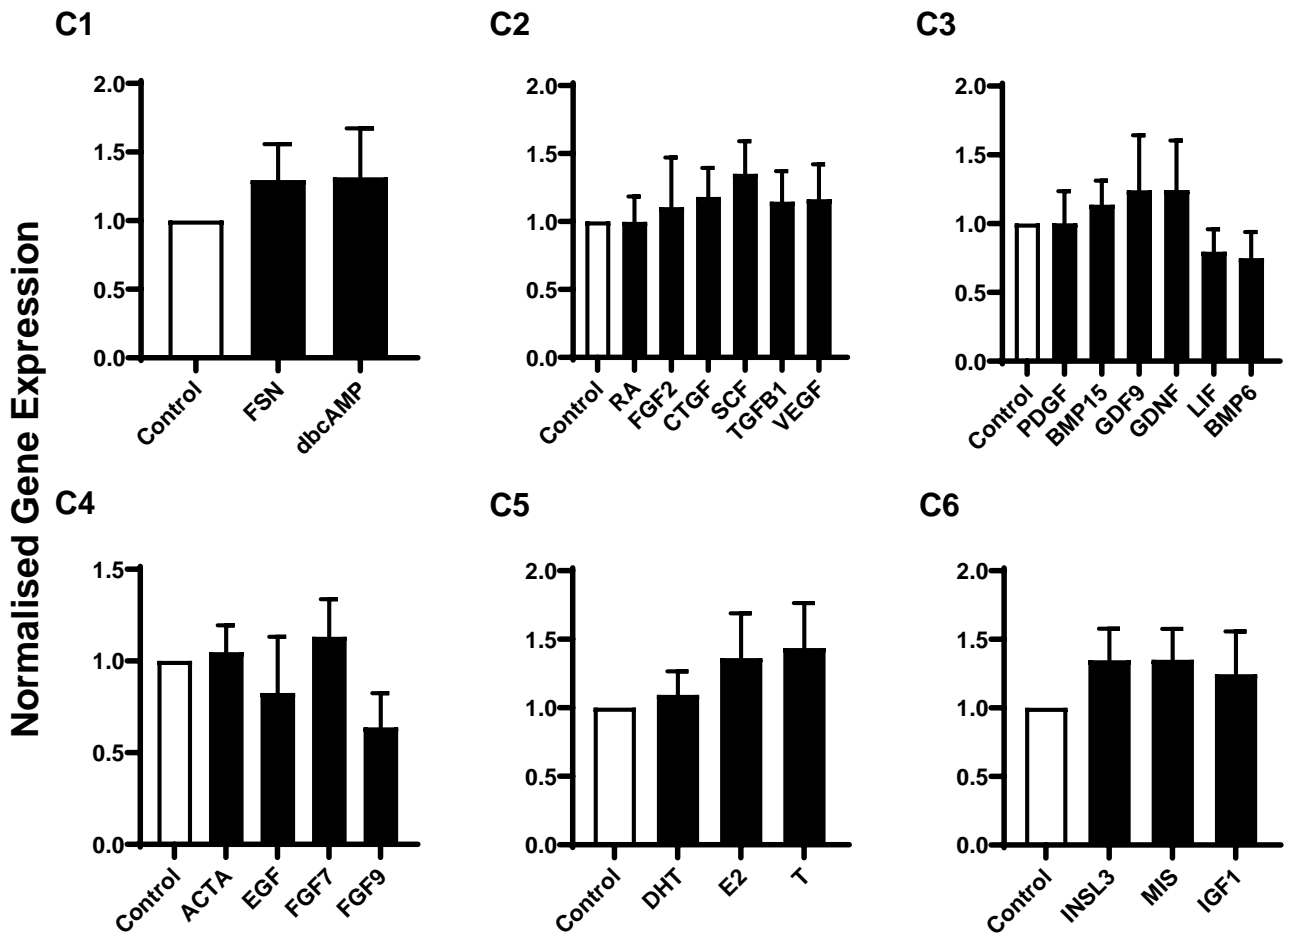

## D COL3A1

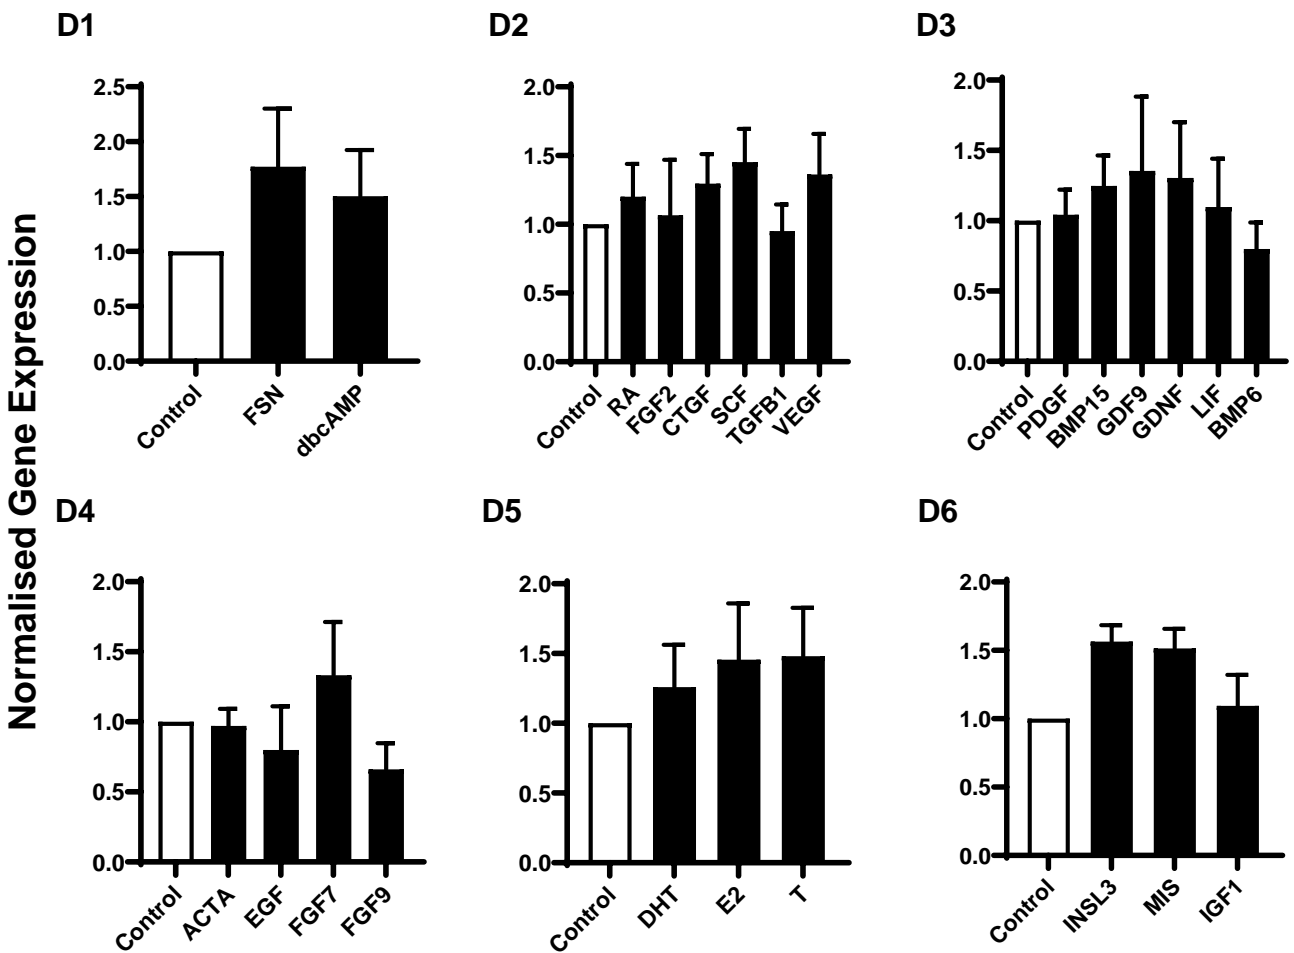

Supplement: pone.0268467.s005.pdf [file pone.0268467.s005.pdf]
