# Supplementary material for: Isolation, culture, and characterisation of bovine ovarian fetal fibroblasts and gonadal ridge epithelial-like cells and comparison to their adult counterparts
Source: PubMed Central journal article supplement (PMC9269465; doi:10.1371/journal.pone.0268467), 2022-07-08

**S6 Fig. mRNA expression levels of stromal genes in fetal fibroblasts cultured in presence or absence of EGF.** Columns in white colour and black colour show gene expression in fetal fibroblasts cultured in the absence of EGF (n = 11) in a previous study [Bastian et al, 2016] and in the presence of EGF (n = 7) in the current study, respectively. Data of gene expression are presented as mean  $\pm$  SEM (normalised to PPIA and RPL32). Significantly different results between groups were determined by Student's t-test. \*\* P < 0.01.

Bastian NA, Bayne RA, Hummitzsch K, Hatzirodos N, Bonner WM, Hartanti MD, et al. Regulation of fibrillins and modulators of TGFbeta in fetal bovine and human ovaries. *Reproduction*. 2016;152(2):127-37. Epub 2016/05/26. doi: 10.1530/rep-16-0172. PubMed PMID: 27222596

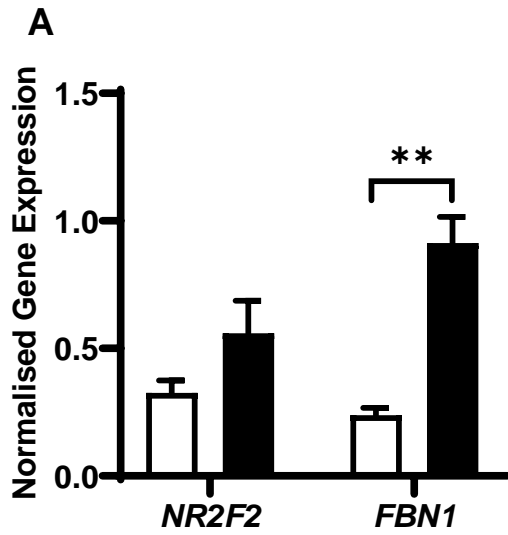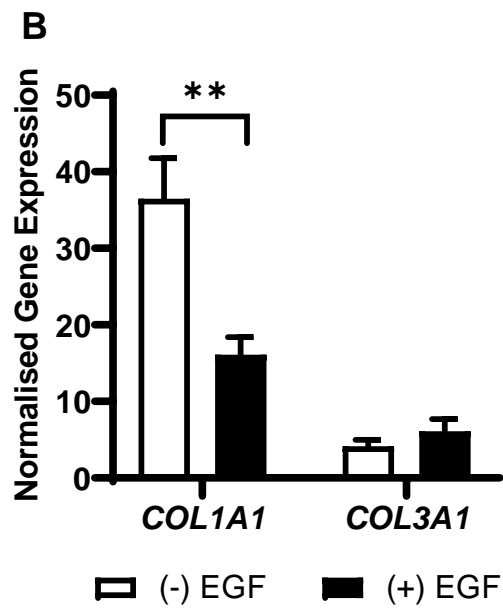

Supplement: pone.0268467.s006.pdf [file pone.0268467.s006.pdf]
