# Supplementary material for: Isolation, culture, and characterisation of bovine ovarian fetal fibroblasts and gonadal ridge epithelial-like cells and comparison to their adult counterparts
Source: PubMed Central journal article supplement (PMC9269465; doi:10.1371/journal.pone.0268467), 2022-07-08
Supplement: pone.0268467.s007.pdf [file pone.0268467.s007.pdf]

**S1 Table. Treatments of cultured bovine fetal ovarian fibroblasts.** Adapted from Bastian et al.

| <b>Treatments</b>                        | <b>Abbreviation</b> | <b>Concentration</b> | <b>Distributor</b>                                          |
|------------------------------------------|---------------------|----------------------|-------------------------------------------------------------|
| Dihydroxytestosterone                    | DHT                 | 100 ng/ml            | Sigma-Aldrich                                               |
| Oestradiol                               | E2                  | 100 ng/ml            | Sigma-Aldrich                                               |
| Testosterone                             | T                   | 100 ng/ml            | Sigma-Aldrich                                               |
| Insulin-like protein 3                   | INSL3               | 100 ng/ml            | From Dr. Ross Bathgate – University of Melbourne, Australia |
| Müllerian inhibiting substance           | MIS                 | 10 ng/ml             | Biogen Idec Australia Pty Ltd., North Ryde, NSW, Australia  |
| Insulin-like growth factor 1             | IGF1                | 30 ng/ml             | GroPep Bioreagents Pty Ltd., Thebarton, SA, Australia       |
| Forskolin                                | FSK                 | 4.1 µg/ml            | Sigma-Aldrich                                               |
| Dibutyryl adenosine cyclic monophosphate | DBcAMP              | 1 mM                 | Sigma-Aldrich                                               |
| Retinoic acid                            | RA                  | 3 µg/ml              | Sigma-Aldrich                                               |
| Activin A                                | ACTA                | 100 ng/ml            | R&D Systems                                                 |
| Basic fibroblast growth factor           | bFGF                | 100 ng/ml            | Roche Australia Pty Ltd., Thebarton, SA, Australia          |
| Bone morphogenetic protein 6             | BMP6                | 100 ng/ml            | R&D Systems                                                 |
| Epidermal growth factor                  | EGF                 | 10 ng/ml             | Boehringer Ingelheim Pty Ltd., North Ryde, NSW, Australia   |
| Fibroblast growth factor 7               | FGF7                | 10 ng/ml             | R&D Systems                                                 |
| Fibroblast growth factor 9               | FGF9                | 30 ng/ml             | R&D Systems                                                 |
| Platelet-derived growth factor           | PDGF                | 10 ng/ml             | R&D Systems                                                 |
| Bone morphogenetic protein 15            | BMP15               | 100 ng/ml            | R&D Systems                                                 |
| Connective tissue growth                 | CTGF                | 25 ng/ml             | Invitrogen/Life Technologies                                |
| Stem cell factor                         | SCF                 | 100 ng/ml            | R&D Systems                                                 |

|                                        |       |                      |               |
|----------------------------------------|-------|----------------------|---------------|
| Transforming growth factor beta 1      | TGFβ1 | 10 ng/ml             | R&D Systems   |
| Vascular endothelial growth factor     | VEGF  | 10 ng/ml             | R&D Systems   |
| Glial-derived factor 9                 | GDF9  | 100 ng/ml            | R&D Systems   |
| Glial-cell derived neurotrophic factor | GDNF  | 100 ng/ml            | R&D Systems   |
| Leukaemia inhibitory factor            | LIF   | 10 <sup>3</sup> U/ml | Sigma-Aldrich |

Bastian NA, Bayne RA, Hummitzsch K, Hatzirodos N, Bonner WM, Hartanti MD, et al. Regulation of fibrillins and modulators of TGFbeta in fetal bovine and human ovaries. *Reproduction*. 2016;152(2):127-37. Epub 2016/05/26. doi: 10.1530/rep-16-0172. PubMed PMID: 27222596.
