# Supplementary material for: Isolation, culture, and characterisation of bovine ovarian fetal fibroblasts and gonadal ridge epithelial-like cells and comparison to their adult counterparts
Source: PubMed Central journal article supplement (PMC9269465; doi:10.1371/journal.pone.0268467), 2022-07-08
Supplement: pone.0268467.s008.pdf [file pone.0268467.s008.pdf]

**S2 Table. List of genes and primers used for qRT-PCR.**

| Gene name                                      | Gene Symbol    | Primers (5'→3') (F=forward, R=reverse)                       | Accession Number | Size (bp) |
|------------------------------------------------|----------------|--------------------------------------------------------------|------------------|-----------|
| Ribosomal protein L32                          | <i>RPL32</i>   | F : GCCATCAGAATCACCAATCC<br>R : AAATGTGCACACGAGCTGTC         | NM_001034783.2   | 73        |
| Peptidylprolyl isomerase A (cyclophilin A)     | <i>PPIA</i>    | F : CTGGCATCTTGTCCATGGCAA<br>R : CCACAGTCAGCAATGGTGATCTTC    | NM_178320.2      | 202       |
| Aldehyde dehydrogenase 1 family, member A1     | <i>ALDH1A1</i> | F : GCGGAAACACAGTGGTTGTC<br>R : GAGAAGAAATGGCTGCCCT          | NM_174239.2      | 150       |
| Cyclin D2                                      | <i>CCND2</i>   | F : GGTGGATCTCCTGGCAAAGA<br>R : ACGGTACTGCTGCAGGCTATTC       | NM_001076372.1   | 98        |
| Cyclin E1                                      | <i>CCNE1</i>   | F : GCCTCAGTATCCTCAGCAAATC<br>R : GAAAATTCTAAGCACCCGACATC    | XM_612960.4      | 84        |
| Cyclin E2                                      | <i>CCNE2</i>   | F : CCTCATTATTCATTGCTTCCAAAC<br>R : TTCACTGCAAGCACCATCAG     | NM_174058.2      | 129       |
| Collagen type 1 alpha 1                        | <i>COL1A1</i>  | F : AAGAAGACATCCCACCAGTCAC<br>R : TAAGTTCGTCGCAGATCACG       | NM_001034039.2   | 149       |
| Collagen type 3 alpha 1                        | <i>COL3A1</i>  | F : AGGACACAGAGGCTTTGATGG<br>R : TTTTCCCCCTTTAATCCAGGAG      | NM_001076831.1   | 72        |
| Collagen type 4 alpha 1                        | <i>COL4A1</i>  | F : TTTCCAGGCGACTCAGGG<br>R : CGTGCCAATAACAGTTCCGG           | XM_580317        | 106       |
| Catenin Beta 1                                 | <i>CTNNB1</i>  | F : GAATTGACAAAACCTGCTGAATGATG<br>R : GATGGCGTGTCTCGAAGCTT   | NM_001076141     | 102       |
| Cytochrome p450 family 11 subfamily A member 1 | <i>CYP11A1</i> | F : CACTTTCGCCACATCGAGAA<br>R : TGAATGATATAAACTGACTCCAAATTGC | NM_176644.2      | 85        |
| Cytochrome p450 family 19 subfamily A member 1 | <i>CYP19A1</i> | F : GGCTATGTGGACGTGTTGACC<br>R : TGAGAAGGAGAGCTTGCCATG       | NM_174305.1      | 142       |
| Deleted in azoospermia-like                    | <i>DAZL</i>    | F : ACGTTTTGCCAGTGAATGC<br>R : TACCACCGTCTGTATGCTTCTG        | NM_001081725.1   | 98        |
| Desmoglein 2                                   | <i>DSG2</i>    | F : TGAGACAAAAGCGTGCTTGG<br>R : CAGAGTGTATCTTGCAATCGG        | NM_001192172.2   | 93        |
| Estrogen receptor 1                            | <i>ESR1</i>    | F : GTCCACCTTTTGGAATGTGC<br>R : ATTTTCCCTGGTTCCTGTCC         | NM_001001443.1   | 124       |

|                                                             |                |                                                          |                |     |
|-------------------------------------------------------------|----------------|----------------------------------------------------------|----------------|-----|
| Estrogen receptor 2                                         | <i>ESR2</i>    | F : TCGACTTCGGAAGTGCTATGAG<br>R : ACCGTTCTCTTGGTTTTGC    | NM_174051.3    | 136 |
| Fibrillin 1                                                 | <i>FBNI</i>    | F : GGGATGGATTTTGTTCGAGGC<br>R : CATCACTGCAGCTACCTCCATT  | NM_174053      | 126 |
| Forkhead box L2                                             | <i>FOXL2</i>   | F : AGAATAGCATCCGCCACAAC<br>R : CCCTTCTCGAACATGTCCCTC    | NM_001031750.1 | 127 |
| Gap junction alpha-1 protein                                | <i>GJA1</i>    | F : TGAGTGCCGTTTACACTTGC<br>R : ACACCAATGACACGACAAGC     | NM_174068.2    | 117 |
| 17beta-hydroxysteroid dehydrogenase                         | <i>HSD17B1</i> | F : TGTGGTACTCATTACCGGCTGTT<br>R : CAGCGTGGCATACACTTTGAA | NM_001102365.6 | 100 |
| 3 beta-hydroxysteroid dehydrogenase                         | <i>HSD3B1</i>  | F : CCGCGAGAGACCATCATGA<br>R : ACGCTGGCCTGGACACA         | NM_174343      | 68  |
| Inhibin, beta A                                             | <i>INHBA</i>   | F : ATCATCACGTTTCGCGGAATC<br>R : ACTTTGCTCCGGGTCCTGTT    | NH_174363.2    | 144 |
| Keratin 19                                                  | <i>KRT19</i>   | F : CGAGGAGGAAATGAGTGTGCT<br>R : ATCTTGGCTAGGTCGATGCC    | NM_001015600.4 | 90  |
| Laminin subunit beta 2                                      | <i>LAMB2</i>   | F : CGGGAGTCACACAGAAAGCA<br>R : CCCAGCCCTACTGCATCGT      | NM_001046247   | 64  |
| Leucine rich repeat containing G protein-coupled receptor 5 | <i>LGR5</i>    | F : TTGGGAGATCTGCTTTTCAACA<br>R : TGTGAGGCGCCATTCAAA     | NM_001277226   | 65  |
| Mucin 1                                                     | <i>MUC1</i>    | F : TTCCCAGTGCTTACAGTTGC<br>R : TTGGGCTGCTTTGTGTAGTG     | NM_174115.2    | 100 |
| Nuclear receptor subfamily 2                                | <i>NR2F2</i>   | F : ACGGATCTTCCAAGAGCAAG<br>R : TTCCACATGGGCTACATCAG     | NM_174402.3    | 130 |
| Nuclear receptor subfamily 5, group A, member 1             | <i>NR5A1</i>   | F : CAGACCTTCATCTCCATCGTG<br>R : CTTGCCATGCTGAATCTGAC    | NM_174403.2    | 147 |
| Occludin                                                    | <i>OCLN</i>    | F : TTCGACCAATGCTCTCTCAG<br>R : GCGATGCACATCACGATAAC     | NM_001082433.2 | 130 |
| Octamer-binding transcription factor 4                      | <i>OCT4</i>    | F : AGGCTTTGCAGCTCAGTTTC<br>R : TTGTTGTCAGCTTCCTCCAC     | NM_174580.2    | 79  |
| Plakophilin 2                                               | <i>PKP2</i>    | F : AGGAGGTGTGATGGACTGATTG<br>R : TGTCATCTGGCTGGTAATCTGC | NM_001083729.1 | 76  |
| Steroidogenic acute regulatory protein                      | <i>STAR</i>    | F : CAGCAGAAGGGTGTTCATCAGA<br>R : GAGAGGACCTGGTTGATGATG  | NM_174189.3    | 152 |

|                                             |               |                                                              |                |     |
|---------------------------------------------|---------------|--------------------------------------------------------------|----------------|-----|
| Transforming growth factor, beta receptor 1 | <i>TGFBR1</i> | F : CAGAGTGGGAACAAAAAGGTACATG<br>R : CATTGCATAGATGTCAGCACGTT | NM_174621.2    | 100 |
| Transforming growth factor, beta receptor 2 | <i>TGFBR2</i> | F : AACGTAGTAACTCCCTGCACTG<br>R : AAACAAACGTGGGTGTGACG       | NM_001159566.1 | 141 |
| Transforming growth factor, beta receptor 3 | <i>TGFBR3</i> | F : TGCACTTTCCTATCCCACAAGCCG<br>R : CCAGATCATTGAGGCATCCAGCG  | XM_005197830.1 | 197 |
| DEAD (Asp-Glu-Ala-Asp) box polypeptide 4    | <i>VASA</i>   | F : ATGAAGCTGATCGCATGCTG<br>R : TGACGCTGTTCTTTGATGG          | NM_001007819.1 | 91  |
