# Supplementary material for: Isolation, culture, and characterisation of bovine ovarian fetal fibroblasts and gonadal ridge epithelial-like cells and comparison to their adult counterparts
Source: PubMed Central journal article supplement (PMC9269465; doi:10.1371/journal.pone.0268467), 2022-07-08
Supplement: pone.0268467.s009.pdf [file pone.0268467.s009.pdf]

**S3 Table. Pearson correlation coefficients (R) of expression levels of 10 newly examined genes in bovine fetal ovaries and gestational age (n = 27).** The intensity of the background color indicates the strength of the significance of the correlation. Blue indicates negative correlations and green indicates positive correlations.

|                | Ages (days)         | <i>MUC1</i>         | <i>PKP2</i>         | <i>CCNE1</i>        | <i>CCNE2</i>       | <i>OCLD</i> | <i>STAR</i>        | <i>COL4A1</i>      | <i>GJA1</i>        | <i>LAMB2</i> |
|----------------|---------------------|---------------------|---------------------|---------------------|--------------------|-------------|--------------------|--------------------|--------------------|--------------|
| <i>MUC1</i>    | -0.890 <sup>c</sup> |                     |                     |                     |                    |             |                    |                    |                    |              |
| <i>PKP2</i>    | -0.778 <sup>c</sup> | 0.749 <sup>c</sup>  |                     |                     |                    |             |                    |                    |                    |              |
| <i>CCNE1</i>   | -0.596 <sup>b</sup> | 0.531 <sup>b</sup>  | 0.511 <sup>b</sup>  |                     |                    |             |                    |                    |                    |              |
| <i>CCNE2</i>   | -0.410 <sup>a</sup> | 0.308               | 0.351               | 0.922 <sup>c</sup>  |                    |             |                    |                    |                    |              |
| <i>OCLD</i>    | -0.047              | -0.09               | 0.086               | 0.589 <sup>b</sup>  | 0.596 <sup>b</sup> |             |                    |                    |                    |              |
| <i>STAR</i>    | 0.464 <sup>a</sup>  | -0.336              | -0.217              | -0.252              | -0.235             | -0.368      |                    |                    |                    |              |
| <i>COL4A1</i>  | 0.476 <sup>a</sup>  | -0.203              | -0.013              | -0.328              | -0.246             | -0.141      | 0.285              |                    |                    |              |
| <i>GJA1</i>    | 0.497 <sup>b</sup>  | -0.402 <sup>a</sup> | -0.251              | -0.322              | -0.221             | 0.017       | 0.236              | 0.516 <sup>b</sup> |                    |              |
| <i>LAMB2</i>   | 0.594 <sup>b</sup>  | -0.503 <sup>b</sup> | -0.266              | -0.239              | -0.092             | 0.219       | 0.247              | 0.500 <sup>b</sup> | 0.462 <sup>a</sup> |              |
| <i>HSD17B1</i> | 0.667 <sup>c</sup>  | -0.528 <sup>b</sup> | -0.472 <sup>a</sup> | -0.391 <sup>a</sup> | -0.364             | -0.215      | 0.717 <sup>c</sup> | 0.473 <sup>a</sup> | 0.332              | 0.236        |

<sup>a</sup>  $P < 0.05$ , <sup>b</sup>  $P < 0.01$ , <sup>c</sup>  $P < 0.0001$ ; Pearson correlation tests.
